# Supplementary material
Source: publisher site journal article supplement (https://www.dovepress.com/article/333569)
Supplement: Supplementary file 1 [file get_supplementary_file.php]

# Supplementary materials

**Supplement 1.**

Production methods of the herbal medicine formulae

**Supplement 2.**

Supplementary Tables

Table S1. Duration of administration, prescribed herbal medicine, and compliance in each patient.

Table S2. Baseline demographic and clinical characteristics.

Table S3. Outcomes of SNSB-II cognitive tests, NPI-Q, and EQ-5D in all patients.

Table S4. Outcomes of SNSB-II cognitive tests, NPI-Q, and EQ-5D in patients administrated Samhwangsasim-tang.

Table S5. Outcomes of SNSB-II cognitive tests, NPI-Q, and EQ-5D in patients administrated Palmul-tang.

Table S6. Results of blood tests before and after the treatment.

**Supplement 1.**

**Production methods of the herbal medicine formulae**

1. **Yukmijihwang-tang**
2. Quality standard of extract

1.0 g of Yukmijihwang-tang extract should contain at least 1.9 mg of Paeoniflorin (C23H28O11: 480.46).

1. Preparation method (one dose)

Yukmijihwang-tang extract is prepared by decocting the following herbs together with 8 to 10 times the amount of water (boiling at 80~100 ℃ for 2 to 3 hours). After the vacuum concentration under 60 ℃, 1.57 to 2.34 g of Yukmijihwang-tang soft extract is obtained.

| Herbal name | Scientific name | Parts used | Amount (g) |
| --- | --- | --- | --- |
| Rehmanniae Radix Preparata | Rehmannia glutinosa (Gaertn.) DC. | Root | 2 |
| Dioscoreae Rhizoma | Dioscorea polystachya Turcz. | Rhizome | 1 |
| Corni Fructus | Cornus officinalis Siebold & Zucc. | Fruit | 1 |
| Poria Sclerotium | Poria cocos Wolf | Sclerotium | 1 |
| Moutan Radicis Cortex | Paeonia × suffruticosa Andrews | Rhizodermis | 1 |
| Alismatis Rhizoma | Alisma plantago-aquatica subsp. orientale (Sam.) Sam. | Rhizome | 1 |

1. Reference

The Korean Food and Drug Administration, The Korean herbal pharmacopoeia, Monograph Part II, Yukmijihwangtang Soft․ Dry Extract

1. **Samhwangsasim-tang**
2. Quality standard of extract

1.0 g of Samhwangsasim-tang extract should contain at least 36.3 mg of Baicalin (C21H18O11: 446.37) and 15.3 mg of Berberine (C20H18CINO4: 371.81)

1. Preparation method (one dose)

Samhwangsasim-tang extract is prepared by decocting the following herbs together with 8 to 10 times the amount of water (boiling at 80~100 ℃ for 2 to 3 hours). After the vacuum concentration under 60 ℃, 0.42 to 0.63 g of Samhwangsasim-tang soft extract is obtained.

| Herbal name | Scientific name | Parts used | Amount (g) |
| --- | --- | --- | --- |
| Rhei Radix et Rhizoma | Rheum palmatum L. | Root and rhizome | 0.67 |
| Coptidis Rhizoma | Coptis japonica (Thunb.) Makino | Rhizome | 0.5 |
| Scutellariae Radix | Scutellaria baicalensis Georgi | Root | 0.5 |

1. Reference

The Korean Food and Drug Administration, The Korean herbal pharmacopoeia, Monograph Part II, Samhwangsasimtang Soft․ Dry Extract

1. **Palmul-tang**
2. Quality standard of mix extract powder

One dose of Palmul-tang mix extract powder should contain at least 0.65 mg of Ginsenoside Rb1 (C54H92O23: 1109.29), 7.4 mg of Glycyrrhizic acid (C42H62O16: 822.92), and 19.4mg of Paeoniflorin (C23H28O11: 480.46).

1. Preparation method (one dose)

Palmul-tang granule is prepared by mixing the following herbal extract powder together.

| Herbal name | Scientific name | Parts used | Amount (g) |
| --- | --- | --- | --- |
| Ginseng Radix | Panax ginseng C.A.Mey. | Root | 1.5 |
| Atractylodis Rhizoma Alba | Atractylodes macrocephala Koidz. | Rhizome | 1.5 |
| Poria Sclerotium | Poria cocos Wolf | Sclerotium | 1.5 |
| Glycyrrhizae Radix et Rhizoma | Glycyrrhiza uralensis Fisch. ex DC. | Root and rhizome | 1.5 |
| Angelicae Gigantis Radix | Angelica gigas Nakai | Root | 1.5 |
| Cnidii Rhizoma | Ligusticum officinale (Makino) Kitag. | Rhizome | 1.5 |
| Paeoniae Radix | Paeonia lactiflora Pall. | Root | 1.5 |
| Rehmanniae Radix Preparata | Rehmannia glutinosa (Gaertn.) DC. | Root | 1.5 |

1. Reference

The Korean Food and Drug Administration, The Korean herbal pharmacopoeia, Monograph Part III, Palmultang Mix Extract Powder

1. **Banhasasim-tang**
2. Quality standard of extract

1.0 g of Banhasasim-tang extract should contain at least 5.5 mg of Glycyrrhizic acid (C42H62O16: 822.92), 0.52 mg of Ginsenoside Rb1 (C54H92O23: 1109.29), 20.4 mg of Baicalin (C21H18O11: 446.37) and 2.7 mg of Berberine (C20H18CINO4: 371.81)

1. Preparation method (one dose)

Banhasasim-tang extract is prepared by decocting the following herbs together with 8 to 10 times the amount of water (boiling at 80~100 ℃ for 2 to 3 hours). After the vacuum concentration under 60 ℃, 1.75 to 2.63 g of Banhasasim-tang soft extract is obtained.

| Herbal name | Scientific name | Parts used | Amount (g) |
| --- | --- | --- | --- |
| Pinelliae Tuber | Pinellia ternata (Thunb.) Makino | Tuber | 1.67 |
| Scutellariae Radix | Scutellaria baicalensis Georgi | Root | 1 |
| Ginseng Radix | Panax ginseng C.A.Mey. | Root | 1 |
| Glycyrrhizae Radix et Rhizoma | Glycyrrhiza uralensis Fisch. ex DC. | Root and rhizome | 1 |
| Zingiberis Rhizoma | Zingiber officinale Roscoe | Rhizome | 0.83 |
| Coptidis Rhizoma | Coptis japonica (Thunb.) Makino | Rhizome | 0.33 |
| Zizyphi Fructus | Ziziphus jujuba Mill. | Fruit | 1 |

1. Reference

The Korean Food and Drug Administration, The Korean herbal pharmacopoeia, Monograph Part II, Banhasasimtang Soft․ Dry Extract

1. **Yukgunja-tang**
2. Quality standard of extract

1.0 g of Yukgunja-tang extract should contain at least 2.1 mg of Glycyrrhizic acid (C42H62O16: 822.92), and 0.46 mg of Ginsenoside Rb1 (C54H92O23: 1109.29).

1. Preparation method (one dose)

Yukgunja-tang extract is prepared by decocting the following herbs together with 8 to 10 times the amount of water (boiling at 80~100 ℃ for 2 to 3 hours). After the vacuum concentration under 60 ℃, 1.66 to 2.49 g of Yukgunja-tang soft extract is obtained.

| Herbal name | Scientific name | Parts used | Amount (g) |
| --- | --- | --- | --- |
| Atractylodis Rhizoma Alba | Atractylodes macrocephala Koidz. | Rhizome | 1.33 |
| Poria Sclerotium | Poria cocos Wolf | Sclerotium | 1.33 |
| Pinelliae Tuber | Pinellia ternata (Thunb.) Makino | Tuber | 1.33 |
| Citri Unshius Pericarpium | Citrus deliciosa Ten. | Pericarpium | 1.33 |
| Ginseng Radix | Panax ginseng C.A.Mey. | Root | 1.33 |
| Glycyrrhizae Radix et Rhizoma | Glycyrrhiza uralensis Fisch. ex DC. | Root and rhizome | 0.5 |
| Zingiberis Rhizoma Recens | Zingiber officinale Roscoe | Rhizoma | 0.67 |
| Zizyphi Fructus | Ziziphus jujuba Mill. | Fruit | 0.67 |

1. Reference

The Korean Food and Drug Administration, The Korean herbal pharmacopoeia, Monograph Part II, Yukgunjatang Soft․ Dry Extract.

**Supplement 2.**

Supplementary Tables

**Table S1** Duration of administration, prescribed herbal medicine, and compliance in each patient

| patients' id | week 0 to week 6 | compliance (%) | week 6 to week 12 | compliance (%) | week 12 to week 24 | compliance (%) |
| --- | --- | --- | --- | --- | --- | --- |
| E001 | Yukmijihwang-tang | 85.00 | Yukmijihwang-tang | 79.80 | Yukmijihwang-tang (until week 15) | 100.00 |
| E002 | Yukmijihwang-tang | 94.12 | Yukmijihwang-tang | - | - | - |
| E003 | Banhasasim-tang | - | - | - | - | - |
| E004 | Palmul-tang | 91.27 | Palmul-tang | 91.27 | - | - |
| E005 | Samhwangsasim-tang | 95.93 | Samhwangsasim-tang | 100.00 | - | - |
| E006 | Samhwangsasim-tang | 92.68 | Samhwangsasim-tang | 92.06 | Samhwangsasim-tang (until week 14) | - |
| E007 | Palmul-tang | 83.33 | Palmul-tang | 100.00 | Palmul-tang (until week 14) | - |
| E008 | Samhwangsasim-tang | 100.00 | Samhwangsasim-tang | 100.00 | Palmul-tang (until week 14) | - |
| E009 | Samhwangsasim-tang | 100.00 | - | - | - | - |
| E010 | Banhasasim-tang | 95.90 | Palmul-tang (until week 10) | 72.22 | - | - |
| E011 | Samhwangsasim-tang | 96.03 | Samhwangsasim-tang | 98.29 | - | - |
| E012 | Yukgunja-tang | - | - | - | - | - |
| E013 | Palmul-tang | 97.62 | Palmul-tang | 100.00 | Palmul-tang (until week 14) | - |
| E014 | Yukmijihwang-tang | 90.00 | Samhwangsasim-tang | 93.86 | Samhwangsasim-tang (until week 14) | - |
| E015 | Banhasasim-tang | - | - | - |  | - |
| E016 | Samhwangsasim-tang | 100.00 | Samhwangsasim-tang | 100.00 | Samhwangsasim-tang (until week 16) | 100.00 |
| E017 | Banhasasim-tang | 93.33 | Banhasasim-tang | 100.00 | - | - |
| E018 | Hyangsayukgunja-tang | 92.06 | - | - | - | - |
| E019 | Palmul-tang | - | - | - | - | - |
| E020 | Palmul-tang | - | - | - | - | - |

**Table S2** Baseline demographic and clinical characteristics

|  |  | YMJ (n=3) | SHS (n=6) | PMT (n=5) | BHS (n=4) | YGJ (n=2) | Total (n=20) | *p*-value |
| --- | --- | --- | --- | --- | --- | --- | --- | --- |
| Age, y |  | 72.3 ± 2.5 | 70.0 ± 6.9 | 73.6 ± 2.2 | 66.8 ± 5.6 | 74.5 ± 0.7 | 71.0 ± 5.1 | 0.260 |
| Sex, n (%) | male | 0 ( 0.0%) | 1 (16.7%) | 1 (20.0%) | 1 (25.0%) | 0 ( 0.0%) | 3 (15.0%) | 0.860 |
| female | 3 (100.0%) | 5 (83.3%) | 4 (80.0%) | 3 (75.0%) | 2 (100.0%) | 17 (85.0%) |  |
| Education | < 6 years | 1 (33.3%) | 3 (50.0%) | 2 (40.0%) | 1 (25.0%) | 1 (50.0%) | 8 (40.0%) | 0.943 |
| ≥ 6 years | 2 (66.7%) | 3 (50.0%) | 3 (60.0%) | 3 (75.0%) | 1 (50.0%) | 12 (60.0%) |  |
| Employment | employed | 1 (33.3%) | 2 (33.3%) | 0 (0.0%) | 2 (50.0%) | 1 (50.0%) | 6 (30.0%) | 0.618 |
| housemaker | 2 (66.7%) | 2 (33.3%) | 2 (40.0%) | 1 (25.0%) | 1 (50.0%) | 8 (40.0%) |  |
| unemployed | 0 ( 0.0%) | 2 (33.3%) | 3 (60.0%) | 1 (25.0%) | 0 ( 0.0%) | 6 (30.0%) |  |
| Medical history | hypertension | 2 (66.7%) | 4 (66.7%) | 4 (80.0%) | 2 (50.0%) | 2 (100.0%) | 14 (70.0%) | 0.753 |
| diabetes mellitus | 1 (33.3%) | 1 (16.7%) | 2 (40.0%) | 2 (50.0%) | 1 (50.0%) | 7 (35.0%) | 0.820 |
| hyperlipidemia | 1 (33.3%) | 0 ( 0.0%) | 2 (40.0%) | 1 (25.0%) | 0 ( 0.0%) | 4 (20.0%) | 0.456 |
| BMI |  | 24.6 ± 2.9 | 24.6 ± 1.8 | 23.4 ± 3.1 | 28.0 ± 2.9 | 27.4 ± 2.5 | 25.2 ± 2.9 | 0.109 |
| MCI subtypes | aMCI (single) | 2 (66.7%) | 0 (0.0%) | 1 (20.0%) | 0 (0.0%) | 0 (0.0%) | 3 (15.0%) | 0.183 |
| aMCI (multiple) | 1 (33.3%) | 1 (16.7%) | 1 (20.0%) | 2 (50.0%) | 1 (50.0%) | 6 (30.0%) |  |
| naMCI (single) | 0 (0.0%) | 0 (0.0%) | 1 (20.0%) | 2 (50.0%) | 0 (0.0%) | 3 (15.0%) |  |
| naMCI (multiple) | 0 (0.0%) | 3 (50.0%) | 1 (20.0%) | 0 (0.0%) | 0 (0.0%) | 4 (20.0%) |  |
| unspecified | 0 (0.0%) | 2 (33.3%) | 1 (20.0%) | 0 (0.0%) | 1 (50.0%) | 4 (20.0%) |  |
| CDR-SB |  | 3.2 ± 0.3 | 3.2 ± 0.4 | 3.3 ± 0.4 | 3.1 ± 0.2 | 3.5 ± 0.0 | 3.2 ± 0.3 | 0.756 |
| GDS | GDS 2 | 2 (66.7%) | 5 (83.3%) | 4 (80.0%) | 3 (75.0%) | 2 (100.0%) | 16 (80.0%) | 0.664 |
| GDS 3 | 0 (0.0%) | 0 (0.0%) | 0 (0.0%) | 1 (25.0%) | 0 (0.0%) | 1 (5.0%) |  |
| GDS 4 | 1 (33.3%) | 1 (16.7%) | 1 (20.0%) | 0 (0.0%) | 0 (0.0%) | 3 (15.0%) |  |
| MoCA |  | 14.3 ± 9.3 | 18.0 ± 2.6 | 18.4 ± 3.0 | 18.0 ± 4.2 | 18.0 ± 1.4 | 17.6 ± 4.2 | 0.761 |
| SNSB five domain T score | attention | 41.8 ± 14.4 | 45.9 ± 7.0 | 52.0 ± 12.1 | 48.7 ± 6.8 | 46.7 ± 20.2 | 47.4 ± 10.3 | 0.763 |
| language | 33.2 ± 37.1 | 43.9 ± 13.0 | 41.8 ± 10.3 | 27.7 ± 7.8 | 36.6 ± 26.2 | 37.8 ± 17.3 | 0.670 |
| visuospatial | 37.1 ± 21.8 | 38.2 ± 11.9 | 47.7 ± 11.9 | 31.8 ± 36.9 | 44.7 ± 11.0 | 39.8 ± 19.3 | 0.819 |
| memory | 25.9 ± 8.6 | 43.5 ± 10.8 | 40.1 ± 12.5 | 38.3 ± 13.3 | 51.0 ± 15.7 | 39.7 ± 12.7 | 0.220 |
| frontal/executive | 36.3 ± 25.7 | 45.1 ± 11.1 | 49.0 ± 8.3 | 32.9 ± 32.5 | 51.2 ± 16.3 | 42.9 ± 18.5 | 0.677 |
| HIS |  | 0.7 ± 1.2 | 0.7 ± 0.8 | 1.8 ± 1.1 | 0.8 ± 0.5 | 1.5 ± 0.7 | 1.0 ± 0.9 | 0.245 |
| SGDepS |  | 2.0 ± 1.7 | 9.8 ± 6.0 | 6.6 ± 6.4 | 4.5 ± 1.7 | 7.5 ± 3.5 | 6.5 ± 5.2 | 0.261 |
| KM Pattern score | qi-deficiency | 7.3 ± 3.2 | 12.3 ± 6.2 | 5.8 ± 3.8 | 4.0 ± 5.7 | 18.0 ± 1.4 | 8.8 ± 6.3 | 0.022 |
| yin-deficiency | 6.0 ± 4.6 | 8.3 ± 4.2 | 5.2 ± 3.1 | 3.5 ± 1.9 | 6.0 ± 5.7 | 6.0 ± 3.8 | 0.401 |
| phlegm-dampness | 1.7 ± 2.9 | 9.5 ± 5.3 | 2.6 ± 3.6 | 5.2 ± 4.1 | 10.5 ± 4.9 | 5.8 ± 5.2 | 0.051 |
| fire-heat | 5.7 ± 4.0 | 11.5 ± 4.2 | 3.2 ± 2.5 | 5.8 ± 2.5 | 7.5 ± 0.7 | 7.0 ± 4.4 | 0.012 |

**Table S3** Outcomes of SNSB-II cognitive tests, NPI-Q, and EQ-5D in all patients

|  |  | week 0 (n=12) | week 12 (n=12) | week 24 (n=11) | p-value |
| --- | --- | --- | --- | --- | --- |
| **SNSB: Attention** |  |  |  |  |  |
| Digit span: Forward (9) |  | 5.25 ± 1.36 | 6.17 ± 1.36 | 5.77 ± 1.39 | 0.0376 |
|  | difference (95% CI) |  | 0.92 (0.17, 1.66) | 0.52 (-0.25, 1.29) |  |
|  | p-value |  | 0.0467 | 0.3550 |  |
| Digit span: Backward (8) |  | 3.92 ± 0.76 | 3.67 ± 0.76 | 3.48 ± 0.79 | 0.2952 |
|  | difference (95% CI) |  | -0.25 (-0.83, 0.33) | -0.44 (-1.03, 0.15) |  |
|  | p-value |  | 0.6439 | 0.2876 |  |
| **SNSB: Language & Related Functions** |  |  |  |  |  |
| Repetition (15) |  | 14.58 ± 0.76 | 14.58 ± 0.76 | 14.64 ± 0.79 | 0.9817 |
|  | difference (95% CI) |  | 0.00 (-0.64, 0.64) | 0.05 (-0.60, 0.71) |  |
|  | p-value |  | 0.9999 | 0.9846 |  |
| Naming: K-BNT (60) |  | 44.17 ± 6.11 | 47.33 ± 6.11 | 49.90 ± 6.17 | <0.0001 |
|  | difference (95% CI) |  | 3.17 (1.25, 5.08) | 5.73 (3.76, 7.71) |  |
|  | p-value |  | 0.0066 | <0.0001 |  |
| Calculation: Total (12) |  | 10.42 ± 1.38 | 10.42 ± 1.38 | 10.84 ± 1.41 | 0.4245 |
|  | difference (95% CI) |  | 0.00 (-0.74, 0.74) | 0.42 (-0.34, 1.18) |  |
|  | p-value |  | 0.9999 | 0.4982 |  |
| Praxis: Ideomotor (5) |  | 4.58 ± 0.47 | 4.75 ± 0.47 | 5.01 ± 0.49 | 0.0760 |
|  | difference (95% CI) |  | 0.17 (-0.21, 0.55) | 0.42 (0.03, 0.81) |  |
|  | p-value |  | 0.6381 | 0.0841 |  |
| **SNSB: Visuospatial Functions** |  |  |  |  |  |
| CDT (3) |  | 2.75 ± 0.36 | 2.92 ± 0.36 | 2.91 ± 0.37 | 0.4386 |
|  | difference (95% CI) |  | 0.17 (-0.14, 0.47) | 0.16 (-0.15, 0.47) |  |
|  | p-value |  | 0.4986 | 0.5438 |  |
| RCFT: copy score (36) |  | 27.25 ± 4.99 | 31.50 ± 4.99 | 32.54 ± 5.07 | <0.0001 |
|  | difference (95% CI) |  | 4.25 (2.10, 6.40) | 5.29 (3.07, 7.51) |  |
|  | p-value |  | 0.0014 | 0.0002 |  |
| RCFT: copy time (sec) |  | 196.00 ± 58.11 | 168.58 ± 58.11 | 170.67 ± 59.97 | 0.2250 |
|  | difference (95% CI) |  | -27.42 (-63.91, 9.07) | -25.33 (-62.90, 12.23) |  |
|  | p-value |  | 0.2835 | 0.3576 |  |
| **SNSB: Memory** |  |  |  |  |  |
| SVLT: immediate recall (trial 1) (12) |  | 3.67 ± 1.10 | 4.08 ± 1.10 | 4.56 ± 1.13 | 0.0383 |
|  | difference (95% CI) |  | 0.42 (-0.29, 1.13) | 0.90 (0.17, 1.62) |  |
|  | p-value |  | 0.4531 | 0.0466 |  |
| SVLT: immediate recall (trial 2) (12) |  | 5.42 ± 1.66 | 6.17 ± 1.66 | 6.84 ± 1.72 | 0.0546 |
|  | difference (95% CI) |  | 0.75 (-0.45, 1.95) | 1.42 (0.19, 2.65) |  |
|  | p-value |  | 0.4084 | 0.0630 |  |
| SVLT: immediate recall (trial 3) (12) |  | 6.00 ± 2.31 | 7.58 ± 2.31 | 7.76 ± 2.35 | 0.0005 |
|  | difference (95% CI) |  | 1.58 (0.56, 2.60) | 1.76 (0.71, 2.81) |  |
|  | p-value |  | 0.0108 | 0.0061 |  |
| SVLT: immediate recal (total) (36) |  | 15.08 ± 4.40 | 17.83 ± 4.40 | 19.08 ± 4.48 | 0.0003 |
|  | difference (95% CI) |  | 2.75 (0.67, 4.83) | 4.00 (1.85, 6.15) |  |
|  | p-value |  | 0.0312 | 0.0024 |  |
| SVLT: delayed recall (12) |  | 3.08 ± 2.66 | 4.67 ± 2.66 | 5.74 ± 2.72 | 0.0003 |
|  | difference (95% CI) |  | 1.58 (0.24, 2.93) | 2.66 (1.27, 4.04) |  |
|  | p-value |  | 0.0576 | 0.0019 |  |
| SVLT: recognition score (24) |  | 18.83 ± 2.91 | 19.17 ± 2.91 | 19.36 ± 2.96 | 0.7033 |
|  | difference (95% CI) |  | 0.33 (-0.95, 1.62) | 0.52 (-0.80, 1.85) |  |
|  | p-value |  | 0.8525 | 0.6930 |  |
| RCFT: immediate recall (36) |  | 8.21 ± 6.52 | 15.08 ± 6.52 | 18.28 ± 6.64 | <0.0001 |
|  | difference (95% CI) |  | 6.87 (3.90, 9.85) | 10.07 (7.00, 13.14) |  |
|  | p-value |  | 0.0003 | <0.0001 |  |
| RCFT: delayed recall (36) |  | 8.42 ± 6.21 | 15.54 ± 6.21 | 17.76 ± 6.31 | <0.0001 |
|  | difference (95% CI) |  | 7.12 (4.49, 9.76) | 9.34 (6.62, 12.07) |  |
|  | p-value |  | <0.0001 | <0.0001 |  |
| RCFT: recognition score (24) |  | 19.75 ± 2.08 | 20.17 ± 2.08 | 20.73 ± 2.17 | 0.4933 |
|  | difference (95% CI) |  | 0.42 (-1.26, 2.09) | 0.98 (-0.74, 2.69) |  |
|  | p-value |  | 0.8635 | 0.4738 |  |
| **SNSB: Frontal/Executive Functions** |  |  |  |  |  |
| Contrasting program (20) |  | 19.50 ± 1.06 | 19.42 ± 1.06 | 19.73 ± 1.11 | 0.7708 |
|  | difference (95% CI) |  | -0.08 (-0.99, 0.82) | 0.23 (-0.69, 1.15) |  |
|  | p-value |  | 0.9799 | 0.8661 |  |
| Go-no-go (20) |  | 18.50 ± 1.51 | 19.17 ± 1.51 | 19.50 ± 1.57 | 0.1708 |
|  | difference (95% CI) |  | 0.67 (-0.44, 1.77) | 1.00 (-0.13, 2.13) |  |
|  | p-value |  | 0.4344 | 0.1834 |  |
| COWAT: Animal |  | 12.25 ± 3.03 | 13.25 ± 3.03 | 11.68 ± 3.09 | 0.0640 |
|  | difference (95% CI) |  | 1.00 (-0.38, 2.38) | -0.57 (-1.99, 0.85) |  |
|  | p-value |  | 0.3065 | 0.6846 |  |
| COWAT: Supermarket |  | 13.00 ± 4.48 | 13.08 ± 4.48 | 14.03 ± 4.62 | 0.6982 |
|  | difference (95% CI) |  | 0.08 (-2.62, 2.78) | 1.03 (-1.75, 3.81) |  |
|  | p-value |  | 0.9977 | 0.7250 |  |
| COWAT: ㄱ |  | 4.75 ± 2.32 | 6.42 ± 2.32 | 6.36 ± 2.39 | 0.0235 |
|  | difference (95% CI) |  | 1.67 (0.24, 3.09) | 1.61 (0.14, 3.08) |  |
|  | p-value |  | 0.0597 | 0.0808 |  |
| COWAT: ㅇ |  | 4.67 ± 3.00 | 5.75 ± 3.00 | 5.26 ± 3.11 | 0.5681 |
|  | difference (95% CI) |  | 1.08 (-1.04, 3.21) | 0.60 (-1.58, 2.78) |  |
|  | p-value |  | 0.5475 | 0.8376 |  |
| COWAT: ㅅ |  | 6.67 ± 3.73 | 6.33 ± 3.73 | 6.40 ± 3.81 | 0.9275 |
|  | difference (95% CI) |  | -0.33 (-2.21, 1.55) | -0.26 (-2.20, 1.67) |  |
|  | p-value |  | 0.9279 | 0.9567 |  |
| Word reading: number of correct response |  | 111.25 ± 1.13 | 111.67 ± 1.13 | 111.29 ± 1.18 | 0.5571 |
|  | difference (95% CI) |  | 0.42 (-0.47, 1.30) | 0.04 (-0.87, 0.94) |  |
|  | p-value |  | 0.5958 | 0.9962 |  |
| Word reading: number of error |  | 0.75 ± 11.68 | 2.33 ± 11.68 | 6.09 ± 12.20 | 0.5341 |
|  | difference (95% CI) |  | 1.58 (-8.33, 11.50) | 5.34 (-4.80, 15.48) |  |
|  | p-value |  | 0.9412 | 0.5273 |  |
| Word reading: response time |  | 78.25 ± 22.14 | 74.42 ± 22.14 | 72.86 ± 22.63 | 0.6032 |
|  | difference (95% CI) |  | -3.83 (-15.07, 7.40) | -5.39 (-16.97, 6.20) |  |
|  | p-value |  | 0.7606 | 0.6051 |  |
| Color reading: number of correct response |  | 75.25 ± 20.56 | 76.42 ± 20.56 | 83.69 ± 20.93 | 0.1415 |
|  | difference (95% CI) |  | 1.17 (-8.07, 10.40) | 8.44 (-1.09, 17.96) |  |
|  | p-value |  | 0.9627 | 0.1807 |  |
| Color reading: number of error |  | 2.17 ± 2.43 | 2.92 ± 2.43 | 2.18 ± 2.53 | 0.6087 |
|  | difference (95% CI) |  | 0.75 (-1.03, 2.53) | 0.01 (-1.82, 1.84) |  |
|  | p-value |  | 0.6606 | 0.9999 |  |
| Color reading: response time (sec) |  | 119.92 ± 3.34 | 118.42 ± 3.34 | 118.68 ± 3.45 | 0.2947 |
|  | difference (95% CI) |  | -1.50 (-3.62, 0.62) | -1.23 (-3.42, 0.95) |  |
|  | p-value |  | 0.3243 | 0.4800 |  |
| **SNSB: Other indexes** |  |  |  |  |  |
| SNSB-D |  | 190.63 ± 26.33 | 221.54 ± 26.33 | 233.67 ± 26.59 | <0.0001 |
|  | difference (95% CI) |  | 30.92 (22.24, 39.59) | 43.04 (34.08, 52.00) |  |
|  | p-value |  | <0.0001 | <0.0001 |  |
| B-ADL |  | 19.58 ± 1.02 | 19.67 ± 1.02 | 19.75 ± 1.04 | 0.8015 |
|  | difference (95% CI) |  | 0.08 (-0.43, 0.60) | 0.17 (-0.36, 0.70) |  |
|  | p-value |  | 0.9402 | 0.7860 |  |
| K-IADL |  | 0.14 ± 0.22 | 0.34 ± 0.22 | 0.32 ± 0.22 | 0.0002 |
|  | difference (95% CI) |  | 0.20 (0.09, 0.31) | 0.19 (0.07, 0.30) |  |
|  | p-value |  | 0.0036 | 0.0075 |  |
| **Neuropsychiatric Inventory-Questionnaire (NPI-Q)** | |  |  |  |  |
| NPI-Q |  | 0.83 ± 0.85 | 0.58 ± 0.85 | 0.38 ± 0.89 | 0.3983 |
|  | difference (95% CI) |  | -0.25 (-0.94, 0.44) | -0.46 (-1.16, 0.25) |  |
|  | p-value |  | 0.7323 | 0.3832 |  |
| **EuroQol-5 dimension (EQ-5D)** |  |  |  |  |  |
| EQ-5D-3L index |  | 0.82 ± 0.13 | 0.82 ± 0.13 | 0.86 ± 0.13 | 0.3720 |
|  | difference (95% CI) |  | 0.00 (-0.05, 0.06) | 0.04 (-0.02, 0.10) |  |
|  | p-value |  | 0.9842 | 0.4089 |  |
| **Body Mass Index (BMI)** |  |  |  |  |  |
| Height |  | 157.03 ± 6.70 | 156.10 ± 6.70 | 156.04 ± 6.74 | 0.3433 |
|  | difference (95% CI) |  | -0.93 (-2.50, 0.63) | -0.99 (-2.61, 0.62) |  |
|  | p-value |  | 0.4438 | 0.4225 |  |
| Weight |  | 61.60 ± 9.16 | 60.75 ± 9.16 | 60.18 ± 9.22 | 0.4777 |
|  | difference (95% CI) |  | -0.85 (-3.22, 1.52) | -1.42 (-3.87, 1.04) |  |
|  | p-value |  | 0.7402 | 0.4656 |  |
| BMI |  | 24.93 ± 2.95 | 24.83 ± 2.95 | 24.60 ± 2.96 | 0.5191 |
|  | difference (95% CI) |  | -0.09 (-0.67, 0.49) | -0.32 (-0.92, 0.28) |  |
|  | p-value |  | 0.9423 | 0.5133 |  |

**Table S4** Outcomes of SNSB-II cognitive tests, NPI-Q, and EQ-5D in patients administrated Samhwangsasim-tang

|  |  | week 0 (n=5) | week 12 (n=5) | week 24 (n=5) | p-value |
| --- | --- | --- | --- | --- | --- |
| **SNSB: Five cognitive domains T score** |  |  |  |  |  |
| Attention |  | 47.53 ± 6.42 | 52.32 ± 6.42 | 50.48 ± 6.42 | 0.4749 |
|  | difference (95% CI) |  | 4.79 (-4.57, 14.15) | 2.95 (-6.41, 12.31) |  |
|  | p-value |  | 0.4843 | 0.7456 |  |
| Language & Related Functions |  | 41.19 ± 10.67 | 52.52 ± 10.68 | 56.40 ± 10.68 | 0.0499 |
|  | difference (95% CI) |  | 11.32 (-3.89, 26.54) | 15.20 (-0.01, 30.42) |  |
|  | p-value |  | 0.2504 | 0.1112 |  |
| Visuospatial Functions |  | 41.87 ± 9.46 | 52.49 ± 9.53 | 50.00 ± 9.53 | 0.0197 |
|  | difference (95% CI) |  | 10.62 (1.37, 19.86) | 8.13 (-1.11, 17.37) |  |
|  | p-value |  | 0.0684 | 0.1638 |  |
| Memory |  | 40.66 ± 10.33 | 55.40 ± 10.40 | 58.23 ± 10.40 | 0.0011 |
|  | difference (95% CI) |  | 14.74 (2.82, 26.66) | 17.56 (5.65, 29.48) |  |
|  | p-value |  | 0.0514 | 0.0243 |  |
| Frontal/Executive Functions |  | 44.55 ± 9.67 | 46.78 ± 9.75 | 53.11 ± 9.75 | 0.0393 |
|  | difference (95% CI) |  | 2.22 (-6.24, 10.69) | 8.56 (0.10, 17.02) |  |
|  | p-value |  | 0.8137 | 0.1070 |  |
| **SNSB: Attention** |  |  |  |  |  |
| Digit span: Forward (9) |  | 5.04 ± 1.08 | 6.02 ± 1.08 | 6.02 ± 1.08 | 0.2239 |
|  | difference (95% CI) |  | 0.98 (-0.56, 2.53) | 0.98 (-0.56, 2.53) |  |
|  | p-value |  | 0.3458 | 0.3458 |  |
| Digit span: Backward (8) |  | 3.60 ± 0.77 | 3.60 ± 0.77 | 3.20 ± 0.77 | 0.6412 |
|  | difference (95% CI) |  | 0.00 (-1.16, 1.16) | -0.40 (-1.56, 0.76) |  |
|  | p-value |  | 0.9999 | 0.7054 |  |
| **SNSB: Language & Related Functions** |  |  |  |  |  |
| Repetition (15) |  | 14.60 ± 0.89 | 14.40 ± 0.89 | 14.60 ± 0.89 | 0.9200 |
|  | difference (95% CI) |  | -0.20 (-1.54, 1.14) | 0.00 (-1.34, 1.34) |  |
|  | p-value |  | 0.9341 | 0.9999 |  |
| Naming: K-BNT (60) |  | 45.68 ± 4.90 | 49.09 ± 4.94 | 50.49 ± 4.94 | 0.0083 |
|  | difference (95% CI) |  | 3.41 (-0.32, 7.13) | 4.81 (1.08, 8.53) |  |
|  | p-value |  | 0.1463 | 0.0432 |  |
| Calculation: Total (12) |  | 9.83 ± 1.49 | 10.02 ± 1.50 | 10.62 ± 1.50 | 0.3926 |
|  | difference (95% CI) |  | 0.19 (-1.27, 1.66) | 0.79 (-0.67, 2.26) |  |
|  | p-value |  | 0.9476 | 0.4479 |  |
| Praxis: Ideomotor (5) |  | 4.61 ± 0.56 | 4.83 ± 0.56 | 5.03 ± 0.56 | 0.3685 |
|  | difference (95% CI) |  | 0.22 (-0.48, 0.93) | 0.42 (-0.28, 1.13) |  |
|  | p-value |  | 0.7480 | 0.3853 |  |
| **SNSB: Visuospatial Functions** |  |  |  |  |  |
| CDT (3) |  | 2.60 ± 0.41 | 3.00 ± 0.41 | 2.80 ± 0.41 | 0.3012 |
|  | difference (95% CI) |  | 0.40 (-0.21, 1.01) | 0.20 (-0.41, 0.81) |  |
|  | p-value |  | 0.3269 | 0.7293 |  |
| RCFT: copy score (36) |  | 26.84 ± 5.05 | 30.23 ± 5.08 | 31.63 ± 5.08 | 0.0116 |
|  | difference (95% CI) |  | 3.39 (-0.46, 7.24) | 4.79 (0.94, 8.64) |  |
|  | p-value |  | 0.1635 | 0.0503 |  |
| RCFT: copy time (sec) |  | 223.66 ± 65.90 | 138.87 ± 66.20 | 183.67 ± 66.20 | 0.0586 |
|  | difference (95% CI) |  | -84.79 (-169.16, -0.42) | -39.99 (-124.36, 44.38) |  |
|  | p-value |  | 0.1092 | 0.5324 |  |
| **SNSB: Memory** |  |  |  |  |  |
| SVLT: immediate recall (trial 1) (12) |  | 3.80 ± 1.03 | 4.20 ± 1.03 | 4.60 ± 1.03 | 0.4724 |
|  | difference (95% CI) |  | 0.40 (-1.14, 1.94) | 0.80 (-0.74, 2.34) |  |
|  | p-value |  | 0.8182 | 0.4770 |  |
| SVLT: immediate recall (trial 2) (12) |  | 5.00 ± 1.29 | 6.60 ± 1.29 | 6.80 ± 1.29 | 0.0539 |
|  | difference (95% CI) |  | 1.60 (-0.33, 3.53) | 1.80 (-0.13, 3.73) |  |
|  | p-value |  | 0.1925 | 0.1382 |  |
| SVLT: immediate recall (trial 3) (12) |  | 6.63 ± 1.39 | 8.29 ± 1.40 | 8.09 ± 1.40 | 0.0596 |
|  | difference (95% CI) |  | 1.66 (-0.13, 3.44) | 1.46 (-0.33, 3.24) |  |
|  | p-value |  | 0.1400 | 0.2002 |  |
| SVLT: immediate recal (total) (36) |  | 15.44 ± 2.88 | 19.09 ± 2.88 | 19.49 ± 2.88 | 0.0316 |
|  | difference (95% CI) |  | 3.65 (-0.34, 7.64) | 4.05 (0.06, 8.04) |  |
|  | p-value |  | 0.1467 | 0.1060 |  |
| SVLT: delayed recall (12) |  | 4.00 ± 1.69 | 5.40 ± 1.69 | 6.60 ± 1.69 | 0.0522 |
|  | difference (95% CI) |  | 1.40 (-1.13, 3.93) | 2.60 (0.07, 5.13) |  |
|  | p-value |  | 0.4352 | 0.1017 |  |
| SVLT: recognition score (24) |  | 20.00 ± 2.40 | 19.76 ± 2.41 | 20.16 ± 2.41 | 0.9452 |
|  | difference (95% CI) |  | -0.25 (-3.19, 2.70) | 0.15 (-2.79, 3.10) |  |
|  | p-value |  | 0.9786 | 0.9918 |  |
| RCFT: immediate recall (36) |  | 5.70 ± 4.47 | 17.26 ± 4.50 | 18.96 ± 4.50 | <0.0001 |
|  | difference (95% CI) |  | 11.56 (6.22, 16.90) | 13.26 (7.92, 18.60) |  |
|  | p-value |  | 0.0034 | 0.0015 |  |
| RCFT: delayed recall (36) |  | 5.05 ± 4.43 | 16.23 ± 4.47 | 18.43 ± 4.47 | <0.0001 |
|  | difference (95% CI) |  | 11.17 (6.86, 15.49) | 13.37 (9.06, 17.69) |  |
|  | p-value |  | 0.0012 | 0.0004 |  |
| RCFT: recognition score (24) |  | 20.60 ± 1.90 | 21.60 ± 1.90 | 20.80 ± 1.90 | 0.6778 |
|  | difference (95% CI) |  | 1.00 (-1.84, 3.84) | 0.20 (-2.64, 3.04) |  |
|  | p-value |  | 0.6958 | 0.9848 |  |
| **SNSB: Frontal/Executive Functions** |  |  |  |  |  |
| Contrasting program (20) |  | 18.99 ± 1.52 | 19.20 ± 1.52 | 19.80 ± 1.52 | 0.6794 |
|  | difference (95% CI) |  | 0.21 (-2.05, 2.47) | 0.81 (-1.45, 3.07) |  |
|  | p-value |  | 0.9742 | 0.6882 |  |
| Go-no-go (20) |  | 16.80 ± 1.55 | 18.60 ± 1.55 | 19.80 ± 1.55 | 0.0083 |
|  | difference (95% CI) |  | 1.80 (-0.51, 4.10) | 3.00 (0.69, 5.30) |  |
|  | p-value |  | 0.2244 | 0.0418 |  |
| COWAT: Animal |  | 14.00 ± 2.93 | 15.38 ± 2.95 | 13.58 ± 2.95 | 0.0185 |
|  | difference (95% CI) |  | 1.37 (-0.31, 3.06) | -0.43 (-2.11, 1.26) |  |
|  | p-value |  | 0.2018 | 0.8255 |  |
| COWAT: Supermarket |  | 14.39 ± 4.57 | 14.41 ± 4.57 | 15.21 ± 4.57 | 0.9483 |
|  | difference (95% CI) |  | 0.02 (-6.77, 6.80) | 0.82 (-5.97, 7.60) |  |
|  | p-value |  | 0.9999 | 0.9566 |  |
| COWAT: ㄱ |  | 5.23 ± 2.35 | 6.30 ± 2.36 | 5.90 ± 2.36 | 0.7171 |
|  | difference (95% CI) |  | 1.06 (-2.04, 4.16) | 0.66 (-2.44, 3.76) |  |
|  | p-value |  | 0.7090 | 0.8713 |  |
| COWAT: ㅇ |  | 5.36 ± 2.79 | 5.63 ± 2.81 | 7.03 ± 2.81 | 0.2140 |
|  | difference (95% CI) |  | 0.27 (-2.22, 2.77) | 1.67 (-0.82, 4.17) |  |
|  | p-value |  | 0.9640 | 0.3129 |  |
| COWAT: ㅅ |  | 8.18 ± 4.47 | 7.19 ± 4.50 | 7.59 ± 4.50 | 0.8561 |
|  | difference (95% CI) |  | -1.00 (-5.23, 3.24) | -0.60 (-4.83, 3.64) |  |
|  | p-value |  | 0.8464 | 0.9411 |  |
| Word reading: number of correct response |  | 111.40 ± 0.58 | 111.80 ± 0.58 | 112.00 ± 0.58 | 0.2466 |
|  | difference (95% CI) |  | 0.40 (-0.46, 1.26) | 0.60 (-0.26, 1.46) |  |
|  | p-value |  | 0.5464 | 0.2908 |  |
| Word reading: number of error |  | 0.60 ± 16.53 | 0.20 ± 16.53 | 12.80 ± 16.53 | 0.3914 |
|  | difference (95% CI) |  | -0.40 (-25.13, 24.33) | 12.20 (-12.53, 36.93) |  |
|  | p-value |  | 0.9992 | 0.5076 |  |
| Word reading: response time |  | 81.05 ± 23.16 | 74.25 ± 23.28 | 61.45 ± 23.28 | 0.2553 |
|  | difference (95% CI) |  | -6.80 (-35.53, 21.92) | -19.60 (-48.33, 9.12) |  |
|  | p-value |  | 0.8449 | 0.3018 |  |
| Color reading: number of correct response |  | 75.69 ± 20.25 | 75.65 ± 20.41 | 87.45 ± 20.41 | 0.3282 |
|  | difference (95% CI) |  | -0.04 (-22.32, 22.24) | 11.76 (-10.52, 34.04) |  |
|  | p-value |  | 0.9999 | 0.4649 |  |
| Color reading: number of error |  | 2.05 ± 2.31 | 4.44 ± 2.32 | 3.04 ± 2.32 | 0.1859 |
|  | difference (95% CI) |  | 2.40 (-0.72, 5.51) | 1.00 (-2.12, 4.11) |  |
|  | p-value |  | 0.2313 | 0.7386 |  |
| Color reading: response time (sec) |  | 118.30 ± 4.98 | 116.46 ± 5.02 | 117.26 ± 5.02 | 0.5751 |
|  | difference (95% CI) |  | -1.84 (-5.97, 2.29) | -1.04 (-5.17, 3.09) |  |
|  | p-value |  | 0.5706 | 0.8276 |  |
| **SNSB: Other indexes** |  |  |  |  |  |
| SNSB-D |  | 189.30 ± 19.12 | 230.88 ± 19.28 | 240.38 ± 19.28 | <0.0001 |
|  | difference (95% CI) |  | 41.58 (22.30, 60.86) | 51.08 (31.80, 70.36) |  |
|  | p-value |  | 0.0035 | 0.0010 |  |
| SGDepS |  | 9.68 ± 5.39 | 9.03 ± 5.40 | 9.43 ± 5.40 | 0.6741 |
|  | difference (95% CI) |  | -0.65 (-2.43, 1.13) | -0.25 (-2.03, 1.53) |  |
|  | p-value |  | 0.6777 | 0.9410 |  |
| B-ADL |  | 19.40 ± 0.77 | 20.00 ± 0.77 | 20.00 ± 0.77 | 0.3679 |
|  | difference (95% CI) |  | 0.60 (-0.56, 1.76) | 0.60 (-0.56, 1.76) |  |
|  | p-value |  | 0.4770 | 0.4770 |  |
| K-IADL |  | 0.18 ± 0.21 | 0.40 ± 0.21 | 0.36 ± 0.21 | 0.0334 |
|  | difference (95% CI) |  | 0.22 (0.01, 0.42) | 0.18 (-0.03, 0.38) |  |
|  | p-value |  | 0.0936 | 0.1756 |  |
| **Neuropsychiatric Inventory-Questionnaire (NPI-Q)** | |  |  |  |  |
| NPI-Q |  | 0.80 ± 0.63 | 0.40 ± 0.63 | 0.20 ± 0.63 | 0.3114 |
|  | difference (95% CI) |  | -0.40 (-1.35, 0.55) | -0.60 (-1.55, 0.35) |  |
|  | p-value |  | 0.6000 | 0.3472 |  |
| **EuroQol-5 dimension (EQ-5D)** |  |  |  |  |  |
| EQ-5D-3L index |  | 0.84 ± 0.15 | 0.78 ± 0.15 | 0.84 ± 0.15 | 0.2719 |
|  | difference (95% CI) |  | -0.06 (-0.18, 0.05) | 0.00 (-0.11, 0.11) |  |
|  | p-value |  | 0.4198 | 0.9999 |  |
| **Body Mass Index (BMI)** |  |  |  |  |  |
| Height |  | 157.17 ± 7.46 | 157.29 ± 7.46 | 157.23 ± 7.46 | 0.8568 |
|  | difference (95% CI) |  | 0.12 (-0.38, 0.61) | 0.06 (-0.44, 0.55) |  |
|  | p-value |  | 0.8488 | 0.9623 |  |
| Weight |  | 61.37 ± 7.40 | 62.02 ± 7.41 | 61.72 ± 7.41 | 0.5318 |
|  | difference (95% CI) |  | 0.66 (-0.73, 2.04) | 0.36 (-1.03, 1.74) |  |
|  | p-value |  | 0.5314 | 0.8197 |  |
| BMI |  | 24.74 ± 1.41 | 24.99 ± 1.41 | 24.85 ± 1.41 | 0.4874 |
|  | difference (95% CI) |  | 0.25 (-0.25, 0.74) | 0.11 (-0.39, 0.60) |  |
|  | p-value |  | 0.5001 | 0.8684 |  |

**Table S5** Outcomes of SNSB-II cognitive tests, NPI-Q, and EQ-5D in patients administrated Palmul-tang

|  |  | week 0 (n=3) | week 12 (n=5) | week 24 (n=4) | p-value |
| --- | --- | --- | --- | --- | --- |
| **SNSB: Five cognitive domains T score** |  |  |  |  |  |
| Attention |  | 56.16 ± 11.83 | 58.99 ± 10.19 | 54.45 ± 10.84 | 0.6966 |
|  | difference (95% CI) |  | 2.83 (-12.92, 18.58) | -1.71 (-18.84, 15.42) |  |
|  | p-value |  | 0.8915 | 0.9645 |  |
| Language & Related Functions |  | 48.95 ± 7.00 | 56.70 ± 5.93 | 57.87 ± 6.35 | 0.0677 |
|  | difference (95% CI) |  | 7.75 (-2.05, 17.55) | 8.91 (-1.72, 19.55) |  |
|  | p-value |  | 0.1996 | 0.1731 |  |
| Visuospatial Functions |  | 45.76 ± 8.46 | 59.25 ± 6.55 | 57.54 ± 7.33 | 0.0750 |
|  | difference (95% CI) |  | 13.48 (-2.40, 29.36) | 11.78 (-4.83, 28.39) |  |
|  | p-value |  | 0.1675 | 0.2544 |  |
| Memory |  | 46.97 ± 10.92 | 51.96 ± 10.00 | 62.14 ± 10.35 | 0.0035 |
|  | difference (95% CI) |  | 4.99 (-6.29, 16.27) | 15.17 (2.82, 27.52) |  |
|  | p-value |  | 0.5346 | 0.0555 |  |
| Frontal/Executive Functions |  | 52.83 ± 3.13 | 58.15 ± 2.43 | 54.77 ± 2.71 | 0.0516 |
|  | difference (95% CI) |  | 5.32 (-0.56, 11.19) | 1.94 (-4.21, 8.08) |  |
|  | p-value |  | 0.1418 | 0.7137 |  |
| **SNSB: Attention** |  |  |  |  |  |
| Digit span: Forward (9) |  | 5.28 ± 1.60 | 5.80 ± 1.44 | 5.38 ± 1.50 | 0.6789 |
|  | difference (95% CI) |  | 0.52 (-1.25, 2.29) | 0.10 (-1.84, 2.04) |  |
|  | p-value |  | 0.7446 | 0.9900 |  |
| Digit span: Backward (8) |  | 4.72 ± 0.71 | 4.00 ± 0.58 | 3.77 ± 0.63 | 0.0904 |
|  | difference (95% CI) |  | -0.72 (-1.77, 0.34) | -0.94 (-2.08, 0.20) |  |
|  | p-value |  | 0.2773 | 0.1783 |  |
| **SNSB: Language & Related Functions** |  |  |  |  |  |
| Repetition (15) |  | 15.13 ± 0.61 | 14.80 ± 0.49 | 14.50 ± 0.54 | 0.2885 |
|  | difference (95% CI) |  | -0.33 (-1.29, 0.62) | -0.63 (-1.66, 0.40) |  |
|  | p-value |  | 0.6644 | 0.3381 |  |
| Naming: K-BNT (60) |  | 43.88 ± 5.01 | 46.20 ± 4.63 | 49.18 ± 4.77 | 0.0358 |
|  | difference (95% CI) |  | 2.32 (-2.60, 7.24) | 5.30 (-0.10, 10.69) |  |
|  | p-value |  | 0.4973 | 0.1127 |  |
| Calculation: Total (12) |  | 10.48 ± 1.33 | 10.60 ± 1.16 | 10.80 ± 1.23 | 0.8979 |
|  | difference (95% CI) |  | 0.12 (-1.55, 1.78) | 0.31 (-1.50, 2.12) |  |
|  | p-value |  | 0.9826 | 0.8992 |  |
| Praxis: Ideomotor (5) |  | 4.67 ± 0.46 | 4.60 ± 0.35 | 5.00 ± 0.39 | 0.3969 |
|  | difference (95% CI) |  | -0.07 (-0.92, 0.79) | 0.33 (-0.56, 1.23) |  |
|  | p-value |  | 0.9782 | 0.6312 |  |
| **SNSB: Visuospatial Functions** |  |  |  |  |  |
| CDT (3) |  | 2.67 ± 0.27 | 3.00 ± 0.21 | 3.00 ± 0.24 | 0.1850 |
|  | difference (95% CI) |  | 0.33 (-0.18, 0.84) | 0.33 (-0.20, 0.87) |  |
|  | p-value |  | 0.3007 | 0.3267 |  |
| RCFT: copy score (36) |  | 25.92 ± 4.71 | 31.90 ± 4.10 | 32.27 ± 4.34 | 0.0208 |
|  | difference (95% CI) |  | 5.98 (-0.05, 12.01) | 6.35 (-0.22, 12.92) |  |
|  | p-value |  | 0.1094 | 0.1177 |  |
| RCFT: copy time (sec) |  | 218.22 ± 48.90 | 210.00 ± 44.01 | 171.12 ± 45.90 | 0.0658 |
|  | difference (95% CI) |  | -8.22 (-63.25, 46.82) | -47.10 (-107.27, 13.07) |  |
|  | p-value |  | 0.9233 | 0.2043 |  |
| **SNSB: Memory** |  |  |  |  |  |
| SVLT: immediate recall (trial 1) (12) |  | 3.70 ± 1.22 | 4.20 ± 1.07 | 4.71 ± 1.13 | 0.3020 |
|  | difference (95% CI) |  | 0.50 (-1.05, 2.05) | 1.01 (-0.68, 2.69) |  |
|  | p-value |  | 0.7017 | 0.3524 |  |
| SVLT: immediate recall (trial 2) (12) |  | 5.34 ± 1.92 | 6.00 ± 1.62 | 7.70 ± 1.74 | 0.0808 |
|  | difference (95% CI) |  | 0.66 (-2.05, 3.37) | 2.36 (-0.58, 5.29) |  |
|  | p-value |  | 0.8134 | 0.1926 |  |
| SVLT: immediate recall (trial 3) (12) |  | 6.39 ± 2.74 | 7.20 ± 2.49 | 8.55 ± 2.59 | 0.1997 |
|  | difference (95% CI) |  | 0.81 (-2.15, 3.77) | 2.16 (-1.07, 5.40) |  |
|  | p-value |  | 0.7729 | 0.2872 |  |
| SVLT: immediate recal (total) (36) |  | 15.75 ± 5.33 | 17.40 ± 4.90 | 20.80 ± 5.06 | 0.0647 |
|  | difference (95% CI) |  | 1.65 (-3.75, 7.04) | 5.04 (-0.87, 10.96) |  |
|  | p-value |  | 0.7279 | 0.1654 |  |
| SVLT: delayed recall (12) |  | 3.74 ± 3.11 | 4.40 ± 2.83 | 6.18 ± 2.94 | 0.1682 |
|  | difference (95% CI) |  | 0.66 (-2.67, 3.99) | 2.44 (-1.21, 6.09) |  |
|  | p-value |  | 0.8707 | 0.2861 |  |
| SVLT: recognition score (24) |  | 19.33 ± 3.01 | 19.40 ± 2.92 | 19.96 ± 2.95 | 0.6482 |
|  | difference (95% CI) |  | 0.07 (-1.85, 1.99) | 0.63 (-1.48, 2.74) |  |
|  | p-value |  | 0.9956 | 0.7385 |  |
| RCFT: immediate recall (36) |  | 10.94 ± 7.02 | 14.10 ± 6.83 | 18.61 ± 6.90 | <0.0001 |
|  | difference (95% CI) |  | 3.16 (-0.94, 7.26) | 7.67 (3.16, 12.18) |  |
|  | p-value |  | 0.2118 | 0.0164 |  |
| RCFT: delayed recall (36) |  | 11.39 ± 6.64 | 14.30 ± 6.38 | 17.33 ± 6.48 | 0.0117 |
|  | difference (95% CI) |  | 2.91 (-1.80, 7.61) | 5.94 (0.77, 11.11) |  |
|  | p-value |  | 0.3320 | 0.0694 |  |
| RCFT: recognition score (24) |  | 19.67 ± 2.10 | 19.40 ± 1.63 | 21.00 ± 1.82 | 0.5004 |
|  | difference (95% CI) |  | -0.27 (-4.22, 3.68) | 1.33 (-2.80, 5.47) |  |
|  | p-value |  | 0.9836 | 0.7029 |  |
| **SNSB: Frontal/Executive Functions** |  |  |  |  |  |
| Contrasting program (20) |  | 19.85 ± 0.65 | 19.60 ± 0.54 | 19.55 ± 0.58 | 0.7230 |
|  | difference (95% CI) |  | -0.25 (-1.18, 0.69) | -0.30 (-1.31, 0.71) |  |
|  | p-value |  | 0.7828 | 0.7401 |  |
| Go-no-go (20) |  | 19.83 ± 1.00 | 19.40 ± 0.84 | 18.82 ± 0.90 | 0.2342 |
|  | difference (95% CI) |  | -0.43 (-1.89, 1.02) | -1.02 (-2.59, 0.55) |  |
|  | p-value |  | 0.7364 | 0.3050 |  |
| COWAT: Animal |  | 13.09 ± 2.30 | 11.20 ± 2.09 | 10.45 ± 2.17 | 0.0412 |
|  | difference (95% CI) |  | -1.89 (-4.38, 0.61) | -2.64 (-5.37, 0.09) |  |
|  | p-value |  | 0.2210 | 0.1180 |  |
| COWAT: Supermarket |  | 13.70 ± 4.56 | 12.60 ± 4.17 | 13.66 ± 4.32 | 0.7498 |
|  | difference (95% CI) |  | -1.10 (-5.87, 3.66) | -0.05 (-5.26, 5.17) |  |
|  | p-value |  | 0.8285 | 0.9997 |  |
| COWAT: ㄱ |  | 5.45 ± 2.63 | 6.80 ± 2.35 | 6.62 ± 2.46 | 0.5073 |
|  | difference (95% CI) |  | 1.35 (-1.69, 4.40) | 1.17 (-2.16, 4.50) |  |
|  | p-value |  | 0.5319 | 0.6607 |  |
| COWAT: ㅇ |  | 5.89 ± 3.87 | 6.20 ± 3.10 | 3.62 ± 3.41 | 0.4782 |
|  | difference (95% CI) |  | 0.31 (-5.97, 6.60) | -2.27 (-9.01, 4.47) |  |
|  | p-value |  | 0.9909 | 0.6832 |  |
| COWAT: ㅅ |  | 6.64 ± 3.19 | 6.20 ± 2.85 | 7.34 ± 2.98 | 0.6741 |
|  | difference (95% CI) |  | -0.44 (-4.15, 3.26) | 0.70 (-3.35, 4.74) |  |
|  | p-value |  | 0.9494 | 0.8999 |  |
| Word reading: number of correct response |  | 111.34 ± 1.71 | 111.40 ± 1.33 | 110.54 ± 1.49 | 0.6969 |
|  | difference (95% CI) |  | 0.06 (-2.96, 3.08) | -0.80 (-3.99, 2.40) |  |
|  | p-value |  | 0.9985 | 0.8060 |  |
| Word reading: number of error |  | 1.28 ± 8.06 | 5.40 ± 6.27 | 0.07 ± 6.99 | 0.5466 |
|  | difference (95% CI) |  | 4.12 (-10.32, 18.56) | -1.21 (-16.47, 14.04) |  |
|  | p-value |  | 0.7560 | 0.9774 |  |
| Word reading: response time |  | 83.99 ± 19.46 | 81.80 ± 18.20 | 89.90 ± 18.69 | 0.4109 |
|  | difference (95% CI) |  | -2.19 (-19.84, 15.46) | 5.91 (-13.45, 25.28) |  |
|  | p-value |  | 0.9460 | 0.7276 |  |
| Color reading: number of correct response |  | 69.61 ± 17.28 | 73.20 ± 15.46 | 73.90 ± 16.17 | 0.8664 |
|  | difference (95% CI) |  | 3.59 (-16.41, 23.59) | 4.29 (-17.56, 26.14) |  |
|  | p-value |  | 0.8917 | 0.8725 |  |
| Color reading: number of error |  | 2.68 ± 2.16 | 1.80 ± 1.95 | 1.51 ± 2.03 | 0.5051 |
|  | difference (95% CI) |  | -0.88 (-3.28, 1.53) | -1.16 (-3.79, 1.47) |  |
|  | p-value |  | 0.6429 | 0.5350 |  |
| Color reading: response time (sec) |  | 120.00 ± 0.00 | 120.00 ± 0.00 | 120.00 ± 0.00 | <0.0001 |
|  | difference (95% CI) |  | 0.00 (0.00, 0.00) | 0.00 (0.00, 0.00) |  |
|  | p-value |  | 0.0803 | 0.0142 |  |
| **SNSB: Other indexes** |  |  |  |  |  |
| SNSB-D |  | 199.46 ± 29.18 | 215.70 ± 28.82 | 231.59 ± 28.95 | <0.0001 |
|  | difference (95% CI) |  | 16.24 (4.69, 27.79) | 32.13 (19.41, 44.85) |  |
|  | p-value |  | 0.0343 | 0.0030 |  |
| SGDepS |  | 6.27 ± 4.53 | 5.40 ± 4.39 | 7.20 ± 4.44 | 0.1889 |
|  | difference (95% CI) |  | -0.87 (-3.74, 2.01) | 0.94 (-2.23, 4.10) |  |
|  | p-value |  | 0.7332 | 0.7411 |  |
| B-ADL |  | 19.78 ± 1.20 | 19.20 ± 1.12 | 19.37 ± 1.15 | 0.3667 |
|  | difference (95% CI) |  | -0.58 (-1.62, 0.47) | -0.41 (-1.56, 0.74) |  |
|  | p-value |  | 0.4014 | 0.6564 |  |
| K-IADL |  | 0.02 ± 0.20 | 0.31 ± 0.17 | 0.32 ± 0.18 | 0.0292 |
|  | difference (95% CI) |  | 0.30 (-0.01, 0.61) | 0.31 (-0.03, 0.64) |  |
|  | p-value |  | 0.1229 | 0.1388 |  |
| **Neuropsychiatric Inventory-Questionnaire (NPI-Q)** | |  |  |  |  |
| NPI-Q |  | 0.44 ± 0.81 | 0.60 ± 0.66 | 0.90 ± 0.72 | 0.6410 |
|  | difference (95% CI) |  | 0.16 (-1.07, 1.40) | 0.47 (-0.87, 1.80) |  |
|  | p-value |  | 0.9390 | 0.6647 |  |
| **EuroQol-5 dimension (EQ-5D)** |  |  |  |  |  |
| EQ-5D-3L index |  | 0.76 ± 0.12 | 0.83 ± 0.11 | 0.84 ± 0.11 | 0.3180 |
|  | difference (95% CI) |  | 0.06 (-0.06, 0.19) | 0.07 (-0.06, 0.21) |  |
|  | p-value |  | 0.4369 | 0.4073 |  |
| **Body Mass Index (BMI)** |  |  |  |  |  |
| Height |  | 155.98 ± 5.39 | 155.74 ± 5.36 | 155.60 ± 5.37 | 0.8022 |
|  | difference (95% CI) |  | -0.24 (-1.59, 1.11) | -0.38 (-1.87, 1.10) |  |
|  | p-value |  | 0.8905 | 0.7941 |  |
| Weight |  | 58.06 ± 8.00 | 58.94 ± 7.99 | 58.30 ± 8.00 | 0.0715 |
|  | difference (95% CI) |  | 0.88 (-0.23, 1.99) | 0.24 (-0.98, 1.46) |  |
|  | p-value |  | 0.1990 | 0.8714 |  |
| BMI |  | 23.72 ± 2.40 | 24.16 ± 2.38 | 23.97 ± 2.39 | 0.3814 |
|  | difference (95% CI) |  | 0.44 (-0.38, 1.26) | 0.25 (-0.66, 1.15) |  |
|  | p-value |  | 0.4227 | 0.7711 |  |

**Table S6** Results of blood tests before and after the treatment

|  |  | week 0 | week 24 | difference (95% CI) | p-value |
| --- | --- | --- | --- | --- | --- |
| WBC | 10^3mm³ | 5.46 ± 1.44 | 6.49 ± 2.37 | 1.03 (0.01, 2.04) | 0.0477 |
| RBC | 10^6mm³ | 4.22 ± 0.42 | 4.15 ± 0.35 | -0.08 (-0.21, 0.06) | 0.2264 |
| Hemoglobin (Hb) | g/dL | 13.40 ± 1.19 | 13.11 ± 0.95 | -0.29 (-0.67, 0.09) | 0.1194 |
| Hematocrit (Hct) | % | 40.09 ± 3.45 | 39.60 ± 2.68 | -0.49 (-1.56, 0.57) | 0.3288 |
| Platelet | 10^4uL | 22.03 ± 7.35 | 22.13 ± 5.37 | 0.10 (-2.13, 2.33) | 0.9225 |
| Neutrophil [seg] | % | 61.19 ± 6.62 | 61.13 ± 7.82 | -0.06 (-4.21, 4.08) | 0.9734 |
| Lymphocyte | % | 27.68 ± 7.22 | 28.44 ± 8.53 | 0.75 (-2.88, 4.39) | 0.6535 |
| Monocyte | % | 8.10 ± 1.77 | 11.11 ± 11.00 | 3.01 (-4.90, 10.91) | 0.4161 |
| Eosinophils | % | 2.55 ± 2.35 | 2.50 ± 1.44 | -0.05 (-0.94, 0.85) | 0.9120 |
| Basophils | % | 0.48 ± 0.20 | 0.43 ± 0.22 | -0.05 (-0.20, 0.09) | 0.4316 |
| AST (GOT) | U/L | 21.73 ± 3.88 | 18.73 ± 2.05 | -3.00 (-6.14, 0.14) | 0.0589 |
| ALT (GPT) | U/L | 20.36 ± 8.00 | 17.00 ± 4.52 | -3.36 (-7.23, 0.50) | 0.0810 |
| γ-GTP | U/L | 20.18 ± 9.81 | 22.09 ± 9.31 | 1.91 (-1.31, 5.12) | 0.2152 |
| BUN | mg/dL | 15.76 ± 4.07 | 17.92 ± 4.89 | 2.15 (-0.39, 4.70) | 0.0891 |
| Creatinine (Cr) | mg/dL | 0.73 ± 0.16 | 0.74 ± 0.22 | 0.01 (-0.04, 0.06) | 0.6967 |
| Total Bilirubin (TB) | mg/dL | 0.55 ± 0.25 | 0.50 ± 0.16 | -0.05 (-0.14, 0.04) | 0.2546 |
| Glucose | mg/dL | 115.36 ± 20.14 | 121.45 ± 55.07 | 6.09 (-21.32, 33.51) | 0.6313 |
| Total Protein (TP) | g/dL | 7.27 ± 0.50 | 7.38 ± 0.44 | 0.11 (-0.11, 0.33) | 0.2901 |
| Albumin | g/dL | 4.51 ± 0.23 | 8.08 ± 11.92 | 3.57 (-4.43, 11.58) | 0.3436 |
| HbA1c | % | 6.07 ± 0.73 | 6.27 ± 1.20 | 0.20 (-0.28, 0.68) | 0.3793 |
